# Supplementary material
Source: publisher site journal article supplement (https://www.dovepress.com/article/530018)
Supplement: Supplementary file 1 [file 530018%20%20Supplementary%20Material.docx]

**Supplementary material 1. Search Strategy**

| Search number | Query | Filters | Search Details | Results |
| --- | --- | --- | --- | --- |
| 1 | intermittent |  | "intermittant"[All Fields] OR "intermittence"[All Fields] OR "intermittencies"[All Fields] OR "intermittency"[All Fields] OR "intermittent"[All Fields] OR "intermittently"[All Fields] | 123,040 |
| 2 | continuous |  | "continual"[All Fields] OR "continually"[All Fields] OR "continuance"[All Fields] OR "continuation"[All Fields] OR "continuations"[All Fields] OR "continue"[All Fields] OR "continued"[All Fields] OR "continuer"[All Fields] OR "continuers"[All Fields] OR "continues"[All Fields] OR "continuing"[All Fields] OR "continuities"[All Fields] OR "continuity"[All Fields] OR "continuous"[All Fields] OR "continuously"[All Fields] | 1,444,299 |
| 3 | thoracoscopic |  | "thoracoscopes"[MeSH Terms] OR "thoracoscopes"[All Fields] OR "thoracoscope"[All Fields] OR "thoracoscopic"[All Fields] OR "thoracoscopical"[All Fields] OR "thoracoscopically"[All Fields] | 19,635 |
| 4 | ((continuous) AND (intermittent)) AND (thoracoscopic) |  | ("continual"[All Fields] OR "continually"[All Fields] OR "continuance"[All Fields] OR "continuation"[All Fields] OR "continuations"[All Fields] OR "continue"[All Fields] OR "continued"[All Fields] OR "continuer"[All Fields] OR "continuers"[All Fields] OR "continues"[All Fields] OR "continuing"[All Fields] OR "continuities"[All Fields] OR "continuity"[All Fields] OR "continuous"[All Fields] OR "continuously"[All Fields]) AND ("intermittant"[All Fields] OR "intermittence"[All Fields] OR "intermittencies"[All Fields] OR "intermittency"[All Fields] OR "intermittent"[All Fields] OR "intermittently"[All Fields]) AND ("thoracoscopes"[MeSH Terms] OR "thoracoscopes"[All Fields] OR "thoracoscope"[All Fields] OR "thoracoscopic"[All Fields] OR "thoracoscopical"[All Fields] OR "thoracoscopically"[All Fields]) | 41 |
| 5 | ((continuous) AND (intermittent)) AND (thoracoscopic) | Clinical Trial | (("continual"[All Fields] OR "continually"[All Fields] OR "continuance"[All Fields] OR "continuation"[All Fields] OR "continuations"[All Fields] OR "continue"[All Fields] OR "continued"[All Fields] OR "continuer"[All Fields] OR "continuers"[All Fields] OR "continues"[All Fields] OR "continuing"[All Fields] OR "continuities"[All Fields] OR "continuity"[All Fields] OR "continuous"[All Fields] OR "continuously"[All Fields]) AND ("intermittant"[All Fields] OR "intermittence"[All Fields] OR "intermittencies"[All Fields] OR "intermittency"[All Fields] OR "intermittent"[All Fields] OR "intermittently"[All Fields]) AND ("thoracoscopes"[MeSH Terms] OR "thoracoscopes"[All Fields] OR "thoracoscope"[All Fields] OR "thoracoscopic"[All Fields] OR "thoracoscopical"[All Fields] OR "thoracoscopically"[All Fields])) AND (clinicaltrial[Filter]) | 15 |
